# Supplementary material
Source: PubMed Central journal article supplement (PMC8614128)
Supplement: NIHMS1045281-supplement-S1.pdf [file NIHMS1045281-supplement-S1.pdf]

Web-based Supplementary Materials for  
**Semiparametric Regression Analysis of Length-Biased Interval-Censored Data**

by

**Fei Gao\*** and **Kwun Chuen Gary Chan Chan\*\***

Department of Biostatistics, University of Washington, Seattle, Washington, U.S.A.

\**email*: feigao@uw.edu

\*\**email*: kcgchan@u.washington.edu

Web Appendix A

*Nonparametric Maximum Likelihood Estimation with Left-continuous  $\hat{\Lambda}$*

We consider the nonparametric maximum likelihood estimation approach where the estimator for  $\Lambda$  is a left-continuous function with potential discontinuous points at the ends of the intervals that bracket the failure times. Specifically, we let  $\lambda_0, \lambda_1, \dots, \lambda_k$  be the respective jump sizes such that  $\Lambda(t) = \sum_{l=1}^j \lambda_l$  for  $t \in (t_{j-1}, t_j]$ , where  $\lambda_0 = 0$ . Write  $\boldsymbol{\lambda} = (\lambda_1, \dots, \lambda_k)$ . We maximize the objective function

$$l_n(\boldsymbol{\beta}, \boldsymbol{\lambda}) \equiv \sum_{i=1}^n \left( \log \left[ \exp \left\{ - \sum_{t_j \leq L_i} \lambda_j \exp(\boldsymbol{\beta}^T \mathbf{Z}_i) \right\} - I(R_i < \infty) \exp \left\{ - \sum_{t_j \leq R_i} \lambda_j \exp(\boldsymbol{\beta}^T \mathbf{Z}_i) \right\} \right] - \log \int_0^\tau \frac{1}{\tau} \exp \left\{ - \sum_{t_{j-1} < a} \lambda_j \exp(\boldsymbol{\beta}^T \mathbf{Z}_i) \right\} da \right).$$

Following from the argument in Section 2.2, the number of truncated samples  $n_i$  follows a negative binomial distribution with parameter

$$\pi_i = P(T_{im}^* < A_{im}^* | \mathbf{Z}_i) = \sum_{j=1}^k (1 - t_{j-1}/\tau) \lambda_j \exp(\boldsymbol{\beta}^T \mathbf{Z}_i) \exp \left\{ - \sum_{l=1}^j \lambda_l \exp(\boldsymbol{\beta}^T \mathbf{Z}_i) \right\},$$

and

$$p_{ij} = P(T_{im}^* = t_j | T_{im}^* < A_{im}^*, \mathbf{Z}_i) = \frac{(1 - t_{j-1}/\tau) \lambda_j \exp(\boldsymbol{\beta}^T \mathbf{Z}_i) \exp \left\{ - \sum_{l=1}^j \lambda_l \exp(\boldsymbol{\beta}^T \mathbf{Z}_i) \right\}}{\pi_i}.$$

A similar EM algorithm can be constructed with  $\widehat{E}(n_{ij})$  replaced by

$$\widehat{E}(n_{ij}) = \frac{(1 - t_{j-1}/\tau)\lambda_j \exp(\boldsymbol{\beta}^\top \mathbf{Z}_i) \exp\left\{-\sum_{l=1}^j \lambda_l \exp(\boldsymbol{\beta}^\top \mathbf{Z}_i)\right\}}{1 - \pi_{ij}}.$$

To see the numerical difference between different versions, we analyzed the simulated data sets in the first set of simulation studies (with length-biased assumption) using the proposed methods. The results are summarized in Web Table 1 and the difference to the right-continuous is small, especially for large  $n$ .

## Web Appendix B

### *Proof of Lemmas*

**Proof of Lemma 1.** Since  $\mathcal{D}_M$  consists of increasing and uniformly bounded functions on  $\mathcal{U}$ , Lemma 2.2 of van der Geer (2000) implies that for any  $\epsilon > 0$ , the bracketing number satisfies

$$N_{[]}(\epsilon, \mathcal{D}_M, \|\cdot\|_{L_2}) \lesssim \epsilon^{-1},$$

where  $\|\cdot\|_{L_2}$  denote the  $L_2$ -norm with respect to the Lebesgue measure on  $\mathcal{U}$ , and  $A \lesssim B$  means that  $A \leq cB$  for a positive constant  $c$ . For  $\epsilon > 0$ , we can find  $\exp\{O(1/\epsilon)\}$  number of brackets  $\{[\Lambda_j^L, \Lambda_j^U]\}$  with  $\|\Lambda_j^L - \Lambda_j^U\|_{L_2} \leq \epsilon$  and  $|\Lambda_j^L(\tau) - \Lambda_j^U(\tau)| < \epsilon$  to cover  $\mathcal{D}_M$ . In addition, there are  $O(\epsilon^{-p})$  number of brackets  $\{[\boldsymbol{\beta}_j^L, \boldsymbol{\beta}_j^U]\}$  covering  $\mathcal{B}$ , such that two  $\|\boldsymbol{\beta}_j^L - \boldsymbol{\beta}_j^U\| \leq \epsilon$ . Hence, there are in total  $\exp\{O(1/\epsilon)\} \times O(\epsilon^{-p})$  brackets that covers  $\mathcal{B} \times \mathcal{D}_M$ . For any pair of parameters  $(\boldsymbol{\beta}_1, \Lambda_1)$  and  $(\boldsymbol{\beta}_2, \Lambda_2)$ , there exists some constant  $c$  such that

$$\begin{aligned} |m(\boldsymbol{\beta}_1, \Lambda_1) - m(\boldsymbol{\beta}_2, \Lambda_2)| &\leq |m(\boldsymbol{\beta}_1, \Lambda_1) - m(\boldsymbol{\beta}_2, \Lambda_1)| + |m(\boldsymbol{\beta}_2, \Lambda_1) - m(\boldsymbol{\beta}_2, \Lambda_2)| \\ &\leq c\|\boldsymbol{\beta}_1 - \boldsymbol{\beta}_2\| + c \sum_{m=0}^M \Delta_m |\Lambda_1(U_m) - \Lambda_2(U_m)| \\ &\quad + c \int_0^\tau |\Lambda_1(a) - \Lambda_2(a)| da. \end{aligned}$$

Therefore,

$$\|m(\boldsymbol{\beta}_1, \Lambda_1) - m(\boldsymbol{\beta}_2, \Lambda_2)\|_{L_2(\mathbb{P})} \leq O\{\|\boldsymbol{\beta}_1 - \boldsymbol{\beta}_2\| + \|\Lambda_1 - \Lambda_2\|_{L_2} + |\Lambda_1(\tau) - \Lambda_2(\tau)|\} = O(\epsilon).$$

The bracketing number of  $\mathcal{M}$  then satisfies

$$N_{[]} \leq \exp\{O(1/\epsilon)\}O(\epsilon^{-p}),$$

such that the entropy integral is finite. The class  $\mathcal{M}$  is then  $\mathbb{P}$ -Donsker.

**Proof of Lemma 2.** By Theorem 1,  $\widehat{\Lambda}$  is consistent for  $\Lambda_0$ . Therefore, there exists a finite constant  $M$  such that  $\widehat{\Lambda}(\tau) \leq M$ . By Lemma 1,  $m(\widehat{\beta}, \widehat{\Lambda})$  belongs to a Donsker class with bracketing integral

$$J_{[]}(\delta, \mathcal{M}, L_2(\mathbb{P})) = \int_0^\delta \sqrt{1 + \log N_{[]}(\epsilon, \mathcal{M}, L_2(\mathbb{P}))} \leq O(\delta^{1/2}).$$

In addition, by Lemma 1.3 of van der Geer (2000) and the mean-value theorem,

$$\mathbb{P} \left\{ m(\widehat{\beta}, \widehat{\Lambda}) - m(\beta_0, \widetilde{\Lambda}) \right\} \lesssim H^2 \left\{ (\widehat{\beta}, \widehat{\Lambda}), (\beta_0, \widetilde{\Lambda}) \right\},$$

where  $H(\cdot, \cdot)$  is the Hellinger distance defined as

$$H \{ (\beta_1, \Lambda_1), (\beta_2, \Lambda_2) \} = \left[ \int \{L(\beta_1, \Lambda_1) - L(\beta_2, \Lambda_2)\}^2 d\mu \right]^{1/2},$$

with respect to the dominating measure  $\mu$ . By Theorem 3.4.1 of van der Vaart and Wellner (1996), there exists  $r_n$  with  $r_n^2 \phi(1/r_n) \sim n^{1/2}$  such that  $H\{(\widehat{\beta}, \widehat{\Lambda}), (\beta_0, \widetilde{\Lambda})\} = O_P(1/r_n)$ , where

$$\phi_n(\delta) = J_{[]}(\delta, \mathcal{M}, H(\cdot, \cdot)) \left\{ 1 + \frac{J_{[]}(\delta, \mathcal{M}, H(\cdot, \cdot))}{\delta^2/\sqrt{n}} \right\}.$$

In particular, we can choose  $r_n$  in the order of  $n^{1/3}$  such that  $H\{(\widehat{\beta}, \widehat{\Lambda}), (\beta_0, \widetilde{\Lambda})\} = O_P(n^{-1/3})$ .

Therefore, there exists finite constants  $c_1$  and  $c_2$  such that

$$\begin{aligned} & O_P(n^{-2/3}) \\ = & E \left[ \left\{ \frac{\sum_{m=0}^M \Delta_m \left[ \exp \left\{ -\widehat{\Lambda}(U_m) \exp \left( \widehat{\beta}^T \mathbf{Z} \right) \right\} - \exp \left\{ -\widehat{\Lambda}(U_{m+1}) \exp \left( \widehat{\beta}^T \mathbf{Z} \right) \right\} \right]}{\int_0^\tau \frac{1}{\tau} \exp \left\{ -\widehat{\Lambda}(a) \exp \left( \widehat{\beta}^T \mathbf{Z} \right) \right\} da} \right. \right. \\ & \left. \left. - \frac{\sum_{m=0}^M \Delta_m \left[ \exp \left\{ -\Lambda_0(U_m) \exp \left( \beta_0^T \mathbf{Z} \right) \right\} - \exp \left\{ -\Lambda_0(U_{m+1}) \exp \left( \beta_0^T \mathbf{Z} \right) \right\} \right]}{\int_0^\tau \frac{1}{\tau} \exp \left\{ -\Lambda_0(a) \exp \left( \beta_0^T \mathbf{Z} \right) \right\} da} \right\}^2 \right] \end{aligned}$$

$$= c_1 \|\widehat{\boldsymbol{\beta}} - \boldsymbol{\beta}_0\|^2 + c_2 E \left( \left[ L(\boldsymbol{\beta}_0, \Lambda_0) \left\{ \sum_{m=0}^M \Delta_m \int_0^\tau Q(t, U_m, U_{m+1}; \boldsymbol{\beta}_0, \Lambda_0) d(\widehat{\Lambda} - \Lambda_0)(t) \right\} \right]^2 \right),$$

where the last equality follows from the mean-value theorem. We define a norm in  $BV(\mathcal{U})$  such that for any  $f \in BV(\mathcal{U})$ ,

$$\|f\|_1 = \left[ E \left\{ \sum_{m=0}^M f(U_m)^2 \right\} \right]^{1/2}.$$

In addition, we define a seminorm

$$\|f\|_2 = E \left( \left[ L(\boldsymbol{\beta}_0, \Lambda_0) \left\{ \sum_{m=0}^M \Delta_m \int_0^\tau Q(t, U_m, U_{m+1}; \boldsymbol{\beta}_0, \Lambda_0) df(t) \right\} \right]^2 \right)^{1/2}.$$

Note that if  $\|f\|_2 = 0$  for some  $f \in BV(\mathcal{U})$ , then

$$L(\boldsymbol{\beta}_0, \Lambda_0) \left\{ \sum_{m=0}^M \Delta_m \int_0^\tau Q(t, U_m, U_{m+1}; \boldsymbol{\beta}_0, \Lambda_0) df(t) \right\} = 0$$

with probability 1.

For any  $m \in \{0, \dots, M\}$ , we sum over all possible  $\Delta_{m'}$  with  $m' = m, \dots, M$  to obtain

$$- \int_0^{U_m} df(t) + \int \frac{\int_0^a \exp \{ -\Lambda_0(a) \exp(\boldsymbol{\beta}_0^\top \mathbf{Z}) \} da}{\int_0^\tau \exp \{ -\Lambda_0(a) \exp(\boldsymbol{\beta}_0^\top \mathbf{Z}) \} da} df(t) = 0.$$

Because  $m$  is arbitrary, we can replace  $U_m$  with any  $t \in \mathcal{U}$ . We differentiate both sides with respect to  $t$  to obtain  $f'(t) = 0$ , such that  $f(t) = 0$  for  $t \in \mathcal{U}$ , implying that  $\|\cdot\|_2$  is a norm in  $BV(\mathcal{U})$ .

By the Cauchy-Schwarz inequality, for any  $f \in BV(\mathcal{U})$ ,

$$\begin{aligned} \|f\|_2 &\leq \left( E \left[ L(\boldsymbol{\beta}_0, \Lambda_0) \left\{ \sum_{m=0}^M \Delta_m \int_0^\tau Q(t, U_m, U_{m+1}; \boldsymbol{\beta}_0, \Lambda_0) dt \right\} \right]^2 E \left\{ \sum_{m=0}^M f(U_m)^2 \right\} \right)^{1/2} \\ &\leq c_3 \|f\|_1, \end{aligned}$$

where  $c_3$  is a finite constant. By the bounded inverse theorem in the Banach space, we have  $\|f\|_2 \geq c'_3 \|f\|_1$  for some constant  $c'_3$ . Therefore,

$$O_P(n^{-2/3}) + O \left( \|\widehat{\boldsymbol{\beta}} - \boldsymbol{\beta}_0\|^2 \right) \geq c_2 c'_3{}^2 E \left[ \sum_{m=0}^M \left\{ \widehat{\Lambda}(U_m) - \Lambda_0(U_m) \right\}^2 \right].$$

The lemma thus holds.

## References

van der Geer, S. A. (2000). *Empirical Processes in M-estimation*. Cambridge: Cambridge University Press.

van der Vaart, A. W. and Wellner, J. A. (1996). *Weak Convergence and Empirical Processes*. New York: Springer.

Web Table 1: Summary statistics for the simulation studies with left-continuous  $\hat{\Lambda}$ .

|           |           | Bias  | SE    | SEE   | RMSE  | CP    | RMSD  |
|-----------|-----------|-------|-------|-------|-------|-------|-------|
| $n = 100$ | $\beta_1$ | 0.006 | 0.168 | 0.171 | 0.168 | 0.957 | 0.003 |
|           | $\beta_2$ | 0.010 | 0.293 | 0.316 | 0.294 | 0.966 | 0.006 |
| $n = 200$ | $\beta_1$ | 0.003 | 0.117 | 0.116 | 0.117 | 0.950 | 0.001 |
|           | $\beta_2$ | 0.003 | 0.205 | 0.212 | 0.205 | 0.957 | 0.003 |
| $n = 400$ | $\beta_1$ | 0.002 | 0.082 | 0.081 | 0.082 | 0.944 | 0.001 |
|           | $\beta_2$ | 0.001 | 0.144 | 0.146 | 0.144 | 0.951 | 0.001 |

Note: SE, SEE, RMSE, CP, and RMSD are the empirical standard error, mean standard error estimator, root mean squared error, empirical coverage probability of the 95% confidence interval, and root mean squared difference to the right-continuous version, respectively.

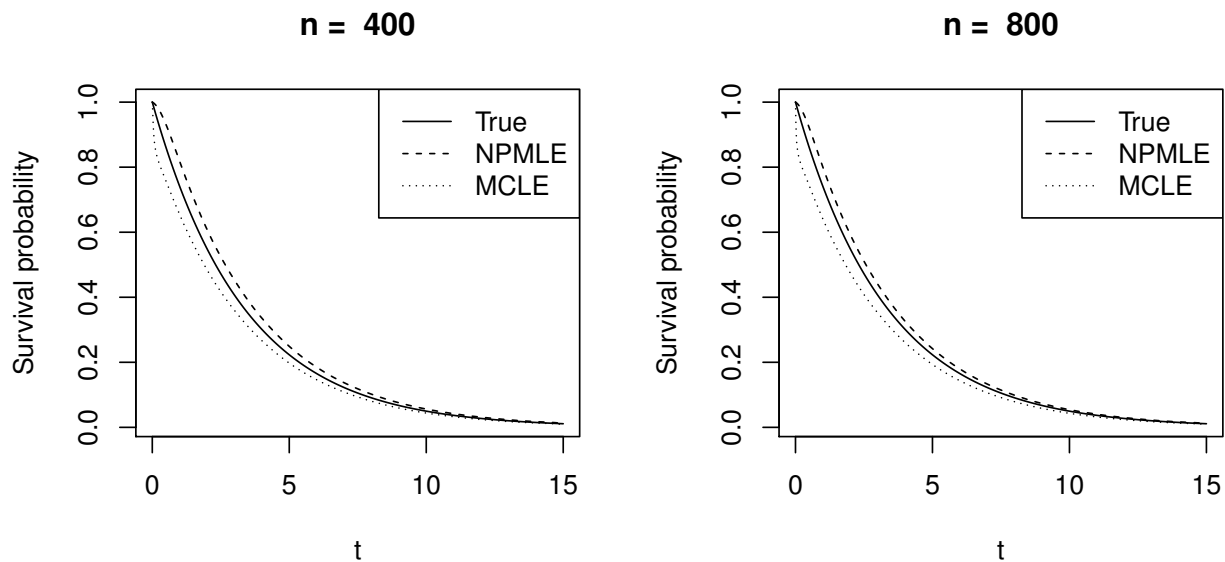

Web Figure 1: Estimated baseline survival functions in simulation studies with length-biased assumption. The solid, dashed, and dotted curves pertain to the true value, the nonparametric maximum likelihood estimation and conditional likelihood estimation, respectively.
